# Supplementary material
Source: Springer Nature journal article supplement (https://www.springermedizin.de/resource/supplementary/13048_2009_26_MOESM5_ESM.pdf/9664734)

CYP17A1 mRNA (fold increase)

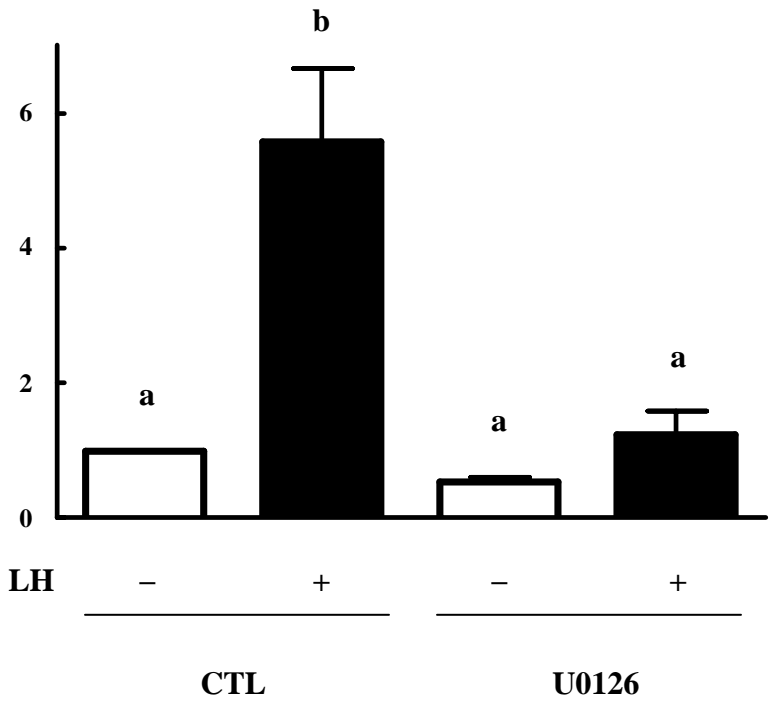

Androstenedione (pg/ml)

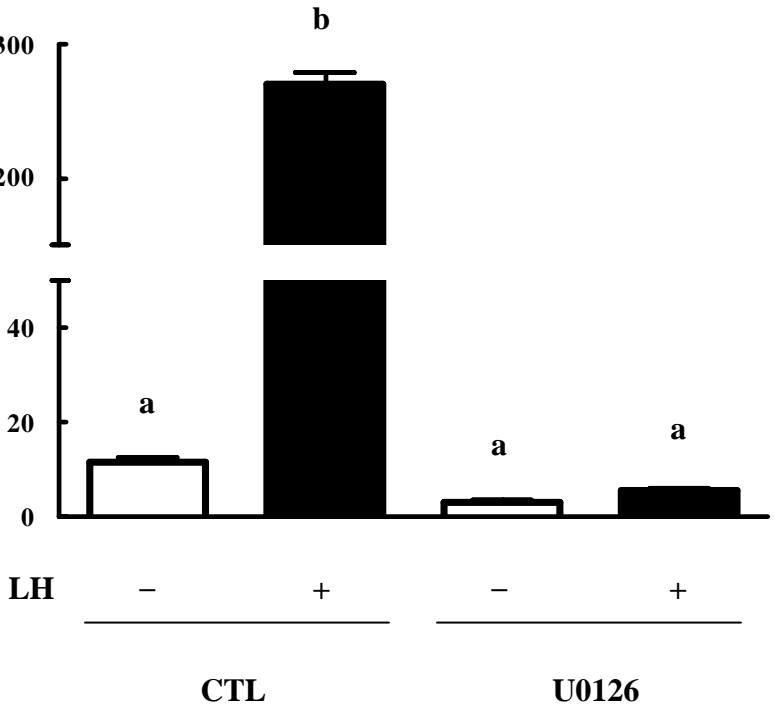

Supplement: MOESM5 [file 9664734]
